# Supplementary material
Source: publisher site journal article supplement (https://www.spandidos-publications.com/3565/downloadSupplementary)

Figure S1. mRNA expression of GAPDH in cells isolated from the gastric wall and gastric mucosa. The groups were the normal control, vehicle, low-PRF002, medium-PRF002, high-PRF002 and positive control.

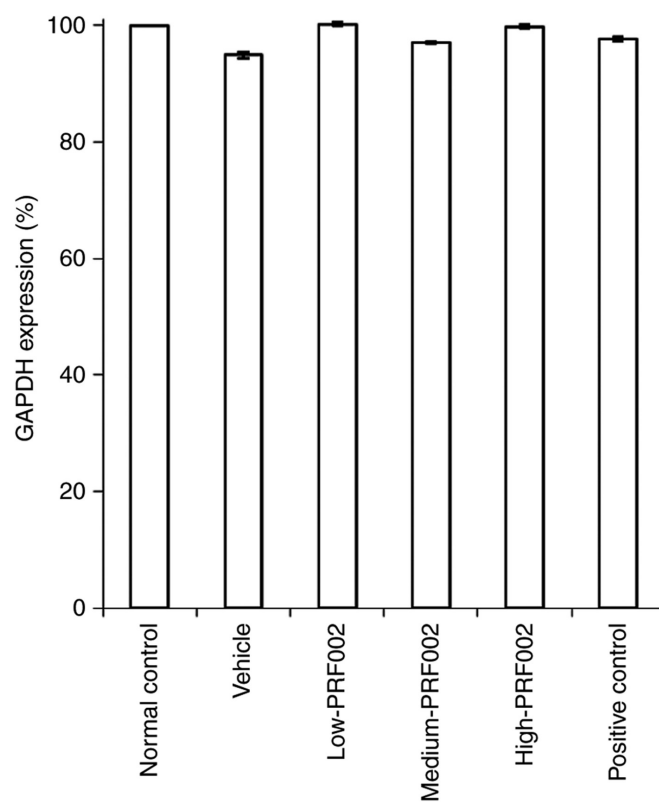

Supplement: Supplementary file 1 [file downloadSupplementary]
